# Supplementary material for: Solvent sensitive intramolecular charge transfer dynamics in the excited states of 4-N,N-dimethylamino-4′-nitrobiphenyl
Source: Royal Society of Chemistry journal article supplement (doi:10.1039/c5cp07778h), 2016-01-01
Supplement: c5cp07778h1.pdf [file c5cp07778h1.pdf]

## Electronic Supplementary Information (ESI)

### Solvent Sensitive Intramolecular Charge Transfer Dynamics in the Excited States of 4-N,N-Dimethylamino-4'-nitrobiphenyl

Rajib Ghosh, Amitabha Nandi and Dipak K. Palit\*

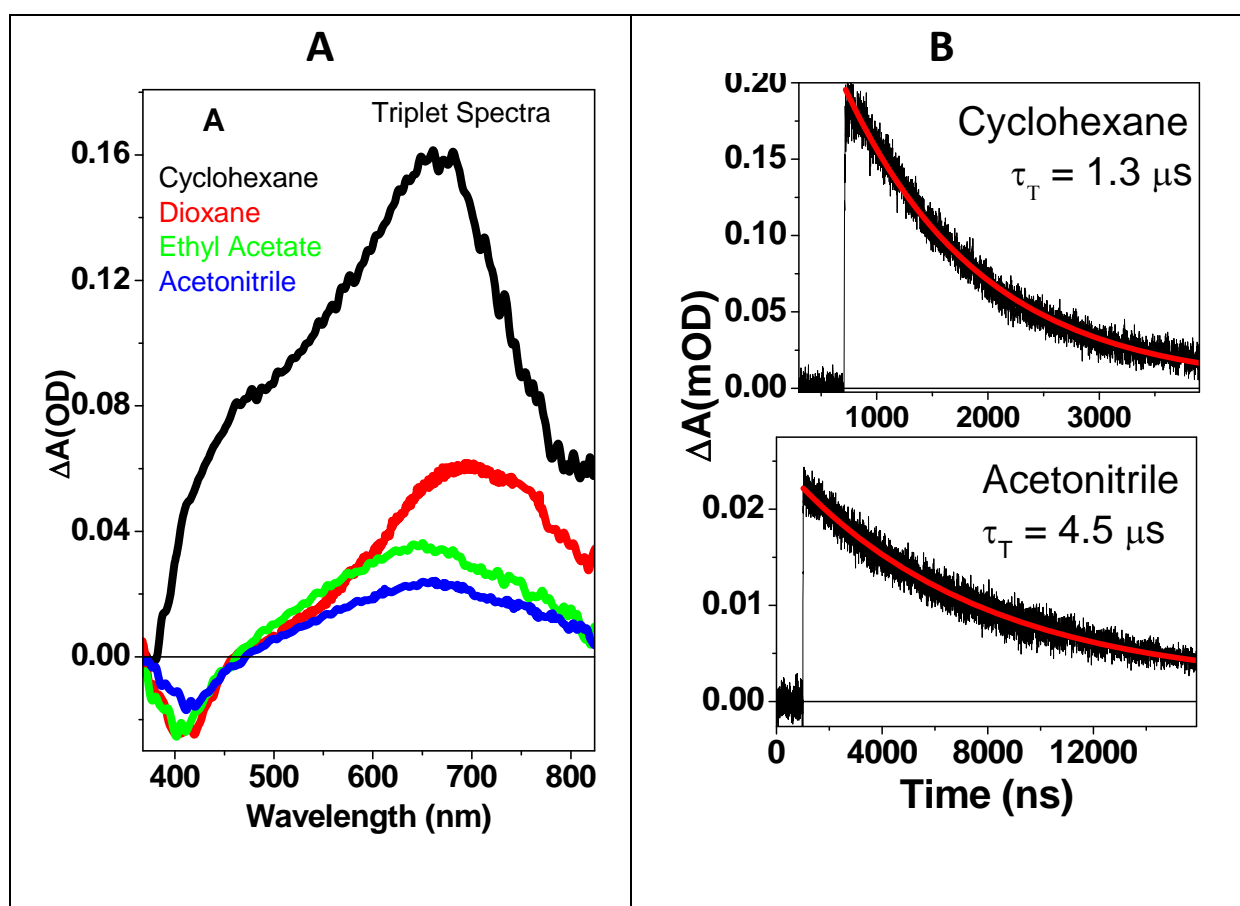

Fig. S1: (A) Transient absorption spectra of DNBP in different solvents (in argon atmosphere) recording at 10 nanosecond delay time following photoexcitation using 355 nm laser pulses. Sample absorption at 355 nm (OD = 0.3) and excitation pulse energy (10mJ/pulse) were kept same for all solvents. (B) Triplet lifetime in cyclohexane and acetonitrile.

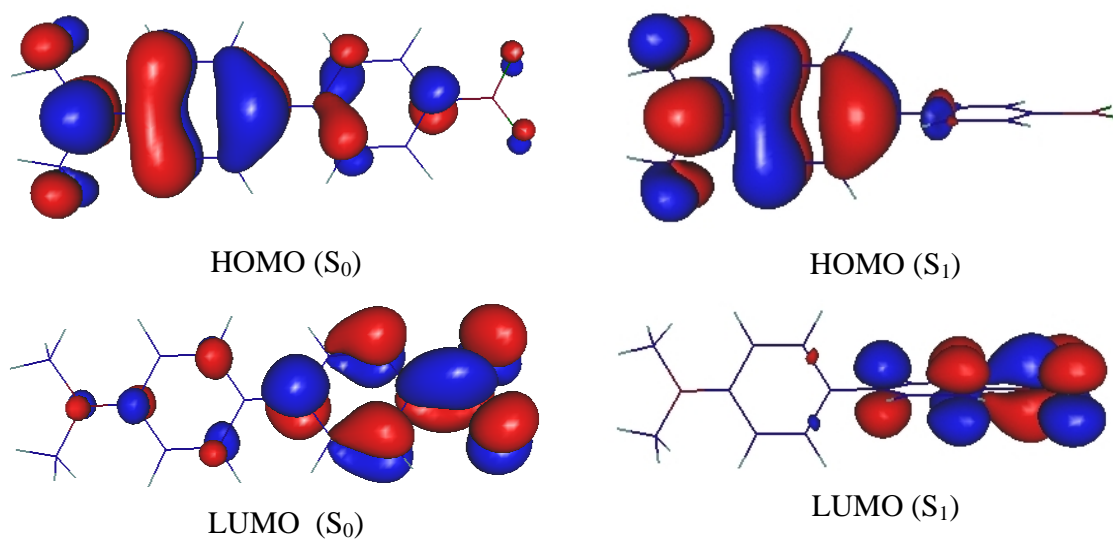

Fig. S2: HOMO and LUMO orbital compositions in the ground electronic state ( $S_0$ ) (left) and the first excited state ( $S_1$ ) (right) with the optimized geometries.

Table T1: Lifetimes and the corresponding amplitudes associated with the multiexponential functions to best fit the temporal profiles recorded at different wavelengths following photoexcitation of DNBP in acetonitrile (IRF  $\sim$ 120 fs).

| Probe wavelength | Lifetimes (amplitude) |
|------------------|-----------------------|
| 540 nm           | IRF (-0.2)            |
|                  | 0.48 ps (+1.0)        |
|                  | 3.0 ps (-0.7)         |
| 750 nm           | IRF (+0.28)           |
|                  | 0.3 ps (-1.0)         |
|                  | 2.7 ps (+0.72)        |
| 810 nm           | IRF (+0.22)           |
|                  | 0.35 ps (-1.00)       |
|                  | 2.8 ps (+0.78)        |
| 900 nm           | IRF (-0.05)           |
|                  | 0.45 ps (-0.95)       |
|                  | 2.9 ps (+1.0)         |

Table T2: Lifetimes and the corresponding amplitudes associated with the multiexponential functions to best fit the temporal profiles recorded at 630 and 860 nm following photoexcitation of DNBP in ethyl acetate (IRF  $\sim$ 120 fs).

| Probe wavelength | Lifetimes (amplitude) |
|------------------|-----------------------|
| 630 nm           | IRF (-0.7)            |
|                  | 0.48 ps (-0.3)        |
|                  | 4.4 ps (0.35)         |
|                  | 66 ps (0.65)          |
| 860 nm           | IRF (+0.6)            |
|                  | 4.2 ps (-1.0)         |
|                  | 70 ps (+0.4)          |

Table T3: Lifetimes and the corresponding amplitudes associated with the multiexponential functions to best fit the temporal profiles recorded at 530, 630 and 690 nm following photoexcitation of DNBP in 1, 4-dioxane (IRF ~120 fs).

| Probe wavelength | Lifetimes (amplitude) |
|------------------|-----------------------|
| 500 nm           | IRF (-1.0)            |
|                  | 2.4 ps (+0.70)        |
|                  | 30 ps (+0.30)         |
| 630 nm           | IRF (+0.1)            |
|                  | 3.1 ps (-0.9)         |
|                  | 35 ps (-0.1)          |
|                  | Long ns (+0.9)        |
| 690 nm           | IRF (+0.15)           |
|                  | 3.0 ps (-0.6)         |
|                  | 30 ps (-0.4)          |
|                  | Long ns (+0.85)       |

Table T4: Lifetimes and the corresponding amplitudes associated with the multiexponential functions to best fit the temporal profiles recorded at 480 and 670 nm following photoexcitation of DNBP in cyclohexane (IRF ~120 fs).

| Probe wavelength | Lifetimes (amplitude) |
|------------------|-----------------------|
| 480 nm           | IRF (+1.0)            |
|                  | 0.8 ps (-0.5)         |
|                  | 10.2ps (-0.3)         |
|                  | Long ns (-0.2)        |
| 670 nm           | IRF (+0.05)           |
|                  | 4.2 ps (+0.95)        |
|                  | Long ns (-1.0)        |
